# Supplementary material for: Prostate cancer multiparametric magnetic resonance imaging visibility is a tumor-intrinsic phenomena
Source: PubMed Central journal article supplement (PMC9066728; doi:10.1186/s13045-022-01268-6), 2022-05-03

# Supplementary Figure 1

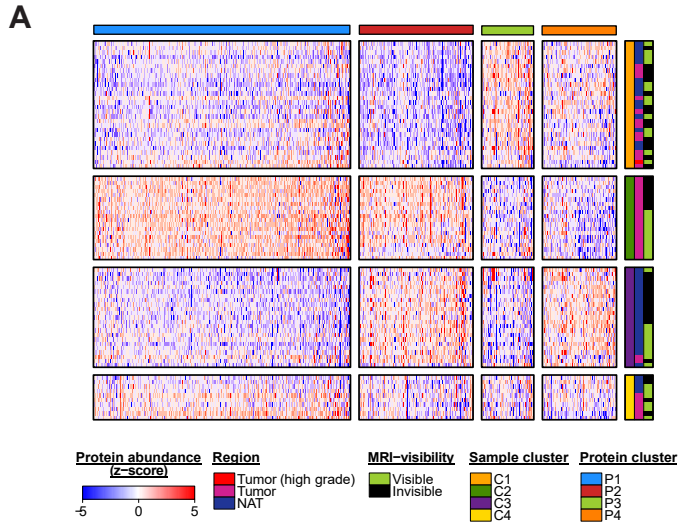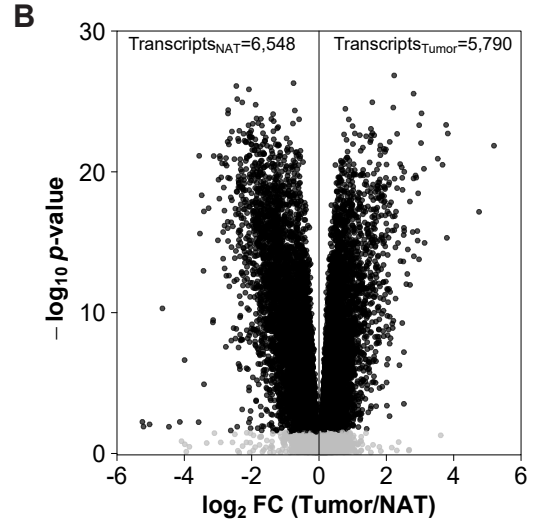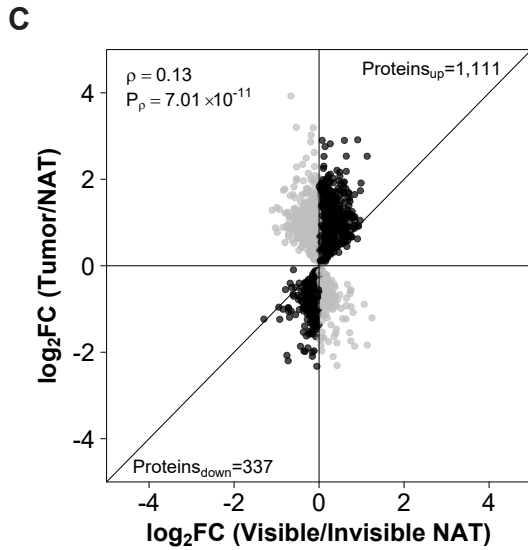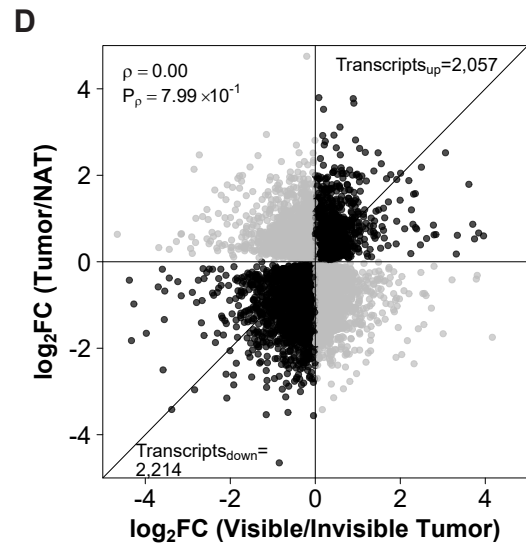

Supplement: 13045_2022_1268_MOESM2_ESM.pdf [file 13045_2022_1268_MOESM2_ESM.pdf]
